# Supplementary material
Source: PubMed Central journal article supplement (PMC3611967)
Supplement: NIHMS452916-supplement-1.pdf [file NIHMS452916-supplement-1.pdf]

# Ligand Affinity and Kinase Activity are Independent of Bacterial Chemotaxis Receptor Concentration: Insight into Signaling Mechanisms

Fe C. Sferdean, Robert M. Weis, and Lynmarie K. Thompson

## Supporting Information

### *Receptor density in proteoliposomes is lower than in vesicle-templated CF study*

The reconstituted Tsr.4E proteoliposomes with the highest receptor concentration contain 55 total lipids per total receptor, which also corresponds to 55 outer leaflet lipids surrounding each kinase-accessible receptor. Using a lipid area of  $0.7 \text{ nm}^2/\text{lipid}$ , the proteoliposomes contain  $38.5 \text{ nm}^2$  of lipid area surrounding each accessible receptor. This is over 2-fold higher than the area surrounding each vesicle-templated CF at the density transition, which occurs at  $\approx 18 \text{ nm}^2/\text{CF}$ . Furthermore, in the templating vesicle system some of the lipids are covered by the CF binding: the transition occurs at  $36 \text{ nm}^2$  total area/CF dimer with  $4 \text{ nm}^2$  occupied by each CF dimer, so there are  $32 \text{ nm}^2$  of lipid area surrounding each CF dimer or  $16 \text{ nm}^2/\text{CF}$ . The larger lipid area per receptor in the proteoliposomes ( $38.5 \text{ nm}^2/\text{receptor}$ ) would not be expected to drive the transition to a more compact state and create a locked-on state of Tsr.4E.

### **Figure S1. Coupled equilibria positioned for maximal ligand-induced change at physiological receptor concentrations predict negligible change in receptor activity vs concentration.**

Data (replotted from Figure 6) were collected for receptor concentrations near the physiological range. Simulations of ligand-induced dissociation model (same parameters as in Figures 5-6) demonstrate that maximal ligand-induced change will occur if receptor association occurs below the physiological range in the absence of ligand (black line) and above the physiological range in the presence of receptor-saturating ligand concentrations (gray line). Under these conditions there would be negligible change in maximal activity but measurable change in ligand affinity (Fig 5).

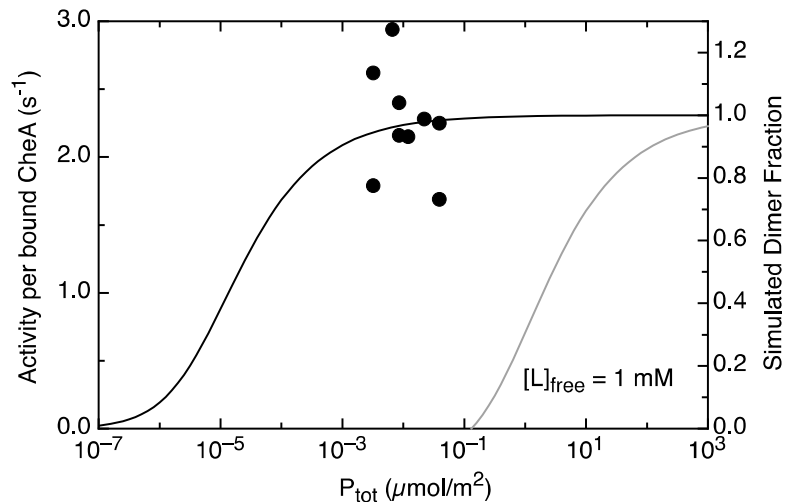

**Table S1.** Kinase activities<sup>a</sup> of reconstituted Tsr.4E.

|   | Lipid:Tsr<br>(Target) | Actual Molar<br>Lipid:Tsr | Activity per Total CheA<br>(s <sup>-1</sup> ) |              | Activity per Bound CheA <sup>b</sup><br>(s <sup>-1</sup> ) |              |
|---|-----------------------|---------------------------|-----------------------------------------------|--------------|------------------------------------------------------------|--------------|
|   |                       |                           | -Ser                                          | +Ser         | -Ser                                                       | +Ser         |
| 1 | 50:1                  | 55:1                      | 0.11<br>0.08                                  | 0.02         | 2.25<br>1.69                                               | 0.44         |
| 2 | 100:1                 | 103:1                     | 0.11                                          | 0.02         | 2.28                                                       | 0.37         |
| 3 | 200:1                 | 186:1                     | 0.11                                          | 0.02         | 2.15                                                       | 0.40         |
| 4 | 400:1                 | 272:1                     | 0.11<br>0.12                                  | 0.03         | 2.16<br>2.40                                               | 0.58         |
| 5 | 600:1                 | 352:1                     | 0.15                                          | 0.03         | 2.94                                                       | 0.64         |
| 6 | 1000:1                | 603:1                     | 0.13<br>0.09                                  | 0.04<br>0.02 | 2.62<br>1.79                                               | 0.79<br>0.43 |

<sup>a</sup>Activities were measured in the presence and absence of 10 mM Ser using [ $\gamma$ -<sup>32</sup>P] ATP incorporation. Complex assembly conditions: 16  $\mu$ M receptor, 7  $\mu$ M CheA, 10  $\mu$ M CheW incubated at 25°C overnight.

<sup>b</sup>Bound CheA (0.35  $\mu$ M) was measured by SDS-PAGE comparison of total and pellet on the 50:1 sample.

**Table S2** Kinase activities<sup>a</sup> of Tsr.4Q<sup>b</sup>.

|          | Lipid:Tsr<br>(Target)       | Actual Molar<br>Lipid:Tsr | Activity per Total CheA<br>(s <sup>-1</sup> ) |              | Activity per Bound CheA <sup>c</sup><br>(s <sup>-1</sup> ) |              |
|----------|-----------------------------|---------------------------|-----------------------------------------------|--------------|------------------------------------------------------------|--------------|
|          |                             |                           | -Ser                                          | +Ser         | -Ser                                                       | +Ser         |
| 1        | 60:1                        | 70:1                      | 0.15<br>0.15                                  | 0.14<br>0.14 | 2.51<br>2.54                                               | 2.39<br>2.36 |
| 2        | 100:1                       | 108:1                     | 0.24<br>0.24                                  | 0.21<br>0.24 | 4.01<br>4.04                                               | 3.52<br>3.92 |
| 3        | 200:1                       | 194:1                     | 0.35<br>0.26                                  | 0.30<br>0.25 | 5.76<br>4.41                                               | 4.98<br>4.11 |
| 4        | 400:1                       | 278:1                     | 0.21                                          | 0.19         | 3.64                                                       | 3.19         |
| 5        | 600:1                       | 335:1                     | 0.21<br>0.24                                  | 0.19         | 3.54<br>3.93                                               | 3.24         |
| 6        | 1000:1                      | 557:1                     | 0.18                                          | 0.16         | 2.93                                                       | 2.63         |
| <b>2</b> | <b>100:1 4E<sup>b</sup></b> |                           | <b>0.21</b>                                   | <b>0.02</b>  | <b>3.48</b>                                                | <b>0.36</b>  |

<sup>a</sup>Activities were measured in the presence and absence of 10 mM Ser using [ $\gamma$ -<sup>32</sup>P] ATP incorporation. Complex assembly conditions: 16  $\mu$ M receptor, 7  $\mu$ M CheA, 10  $\mu$ M CheW incubated at 25°C overnight.

<sup>b</sup>One sample of 100:1 Tsr.4E (bold) is shown for comparison.

<sup>c</sup>Bound CheA (0.44  $\mu$ M) was measured by SDS-PAGE comparison of total and pellet on the 60:1 sample. Individual measurements of bound CheA on each sample of Tsr.4E and Tsr.4Q were not used because these showed a systematic increase in CheA in the pellet with increasing lipid-to-protein ratio. This was judged likely due to increasing entrapment of unbound CheA as the pellet became larger and less compact in the high lipid-to-protein ratio samples.
